# Supplementary material for: Cholinergic midbrain afferents modulate striatal circuits and shape encoding of action strategies
Source: PubMed Central journal article supplement (PMC7142106; doi:10.1038/s41467-020-15514-3), 2020-04-08
Supplement: 41467_2020_15514_MOESM2_ESM.pdf [file 41467_2020_15514_MOESM2_ESM.pdf]

**Editorial Note:** This manuscript has been previously reviewed at another journal that is not operating a transparent peer review scheme. This document only contains reviewer comments and rebuttal letters for versions considered at *Nature Communications*.
